# Supplementary material
Source: publisher figshare collection journal article supplement (https://rs.figshare.com/ndownloader/files/8649742)
Supplement: Supplementary file [file 8649742]

Log2 of Fold Change in Trypanosome Infected Flies

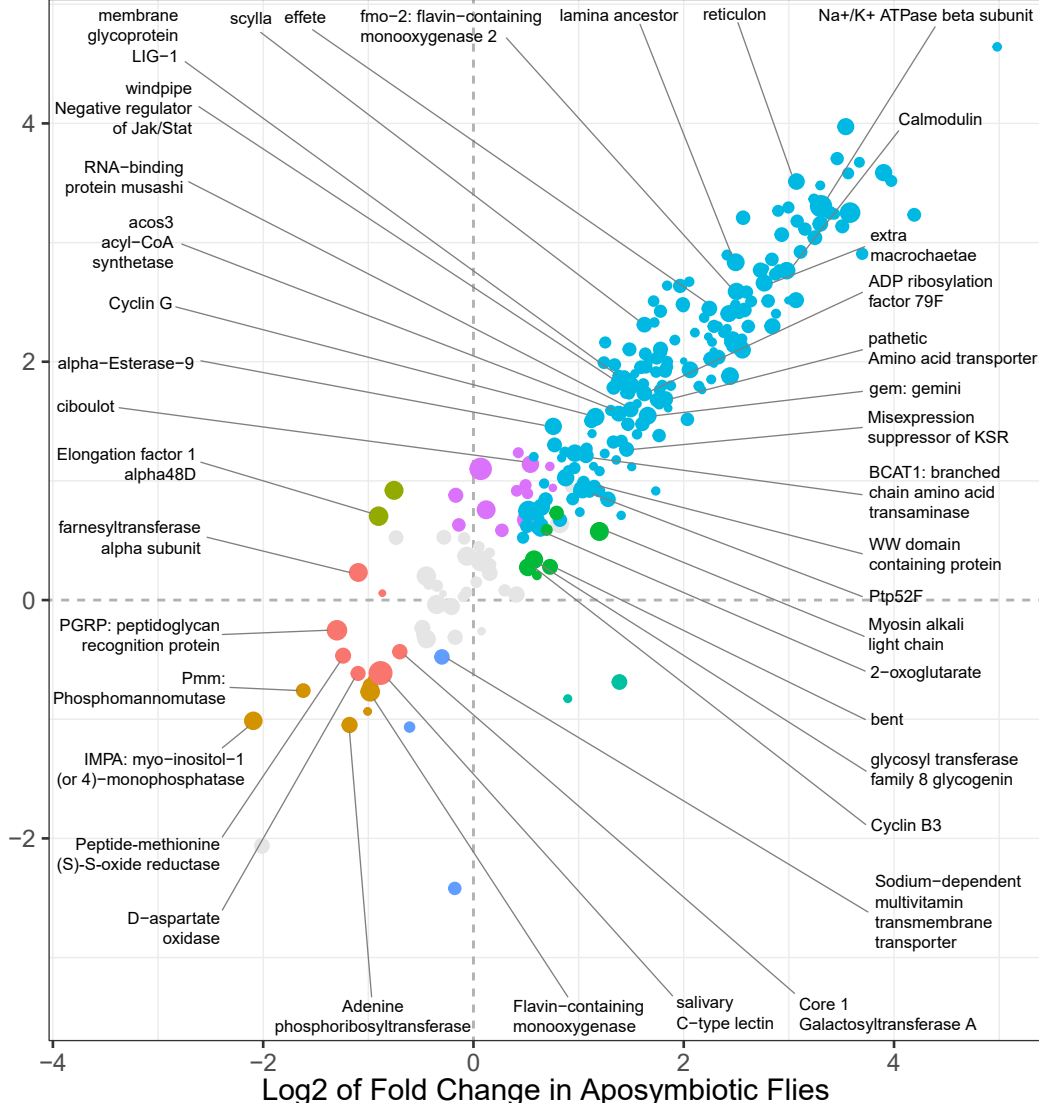

Log2 Bacteriome CPM

- 7.5
- 10.0
- 12.5

Expression Categories

- Apo Down
- Apo Down/Inf Down
- Apo Down/Inf Up
- Apo Up
- Apo Up/Inf Down
- Apo Up/Inf Up
- Inf Down
- Inf Up
- No Change
